# Supplementary material for: Electrolyte-gated amorphous IGZO transistors with extended gates for prostate-specific antigen detection
Source: Royal Society of Chemistry journal article supplement (doi:10.1039/d4lc00247d), 2024-01-01
Supplement: d4lc00247d1.pdf [file d4lc00247d1.pdf]

## Electronic Supplementary Information (ESI)

### Electrolyte-Gated Amorphous IGZO Transistors with Extended Gates for Prostate-Specific Antigen Detection

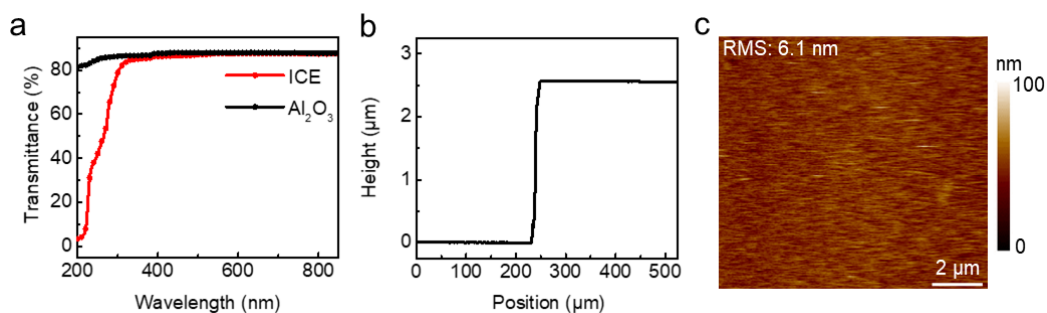

**Fig. S1** (a) UV-visible transmittance of the ICE film. (b) Stylus profiler measurement of the ICE film. (c) AFM image of IGZO on the ICE film.

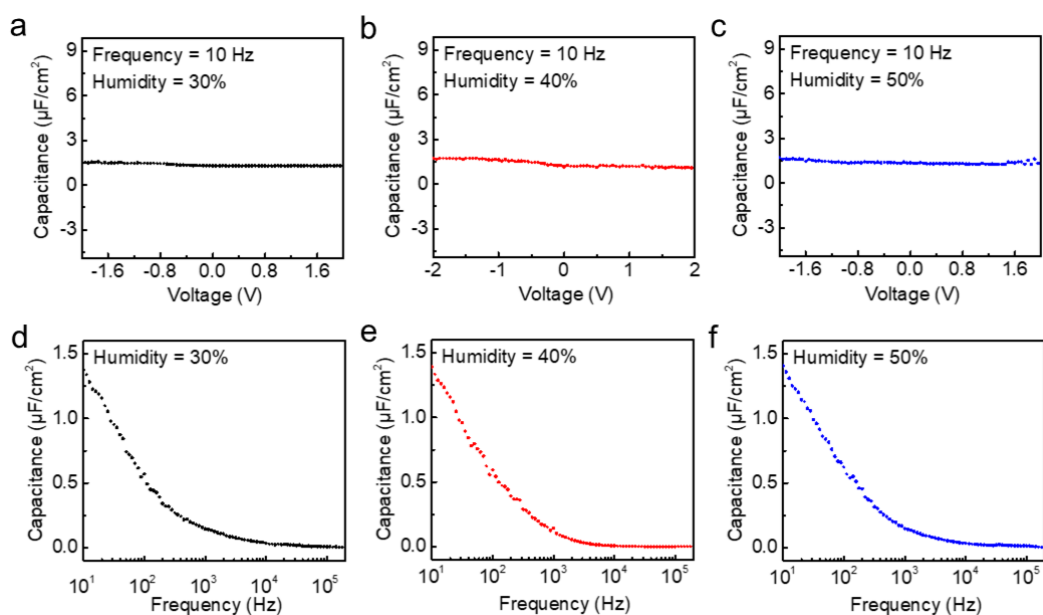

**Fig. S2** Capacitance-voltage characteristics of the EDL capacitor at humidity levels of (a) 30%, (b) 40%, and (c) 50%. Capacitance-frequency characteristics at humidity levels of (d) 30%, (e) 40%, and (f) 50%.

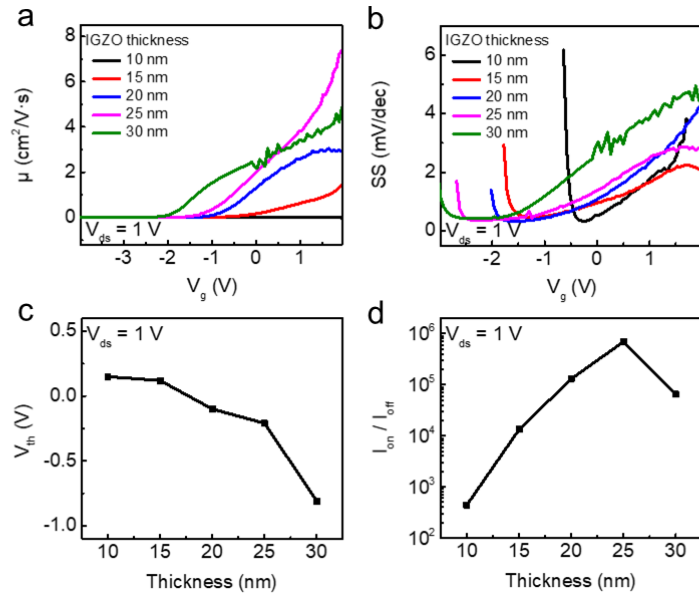

**Fig. S3** Transistor characteristics of different IGZO thicknesses. Plots demonstrating the (a) mobility ( $\mu$ ) and (b) subthreshold swing (SS) as a function of gate voltage ( $V_g$ ). The thickness of IGZO as a function of (c) threshold voltage ( $V_{th}$ ) and (d) switching ratio ( $I_{on}/I_{off}$ ).

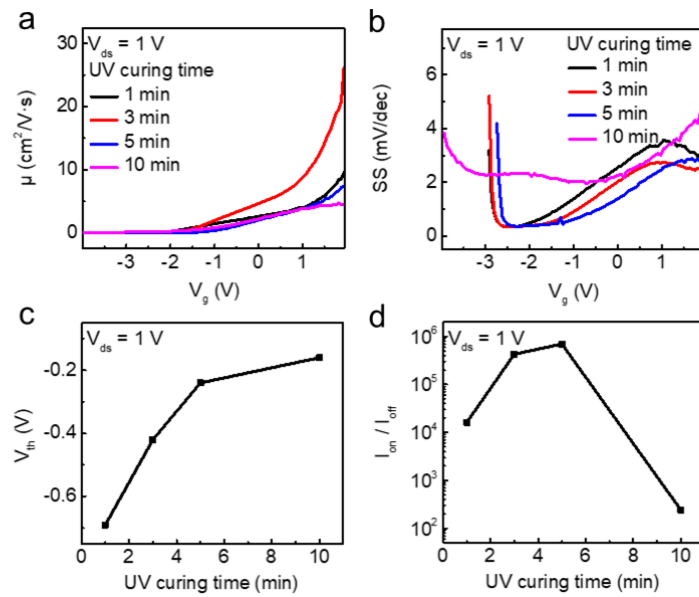

**Fig. S4** Transistor characteristics with different UV curing time. Plots demonstrating the (a)  $\mu$  and (b) SS as a function of  $V_g$ . UV curing time as a function of (c)  $V_{th}$  and (d)  $I_{on}/I_{off}$ .

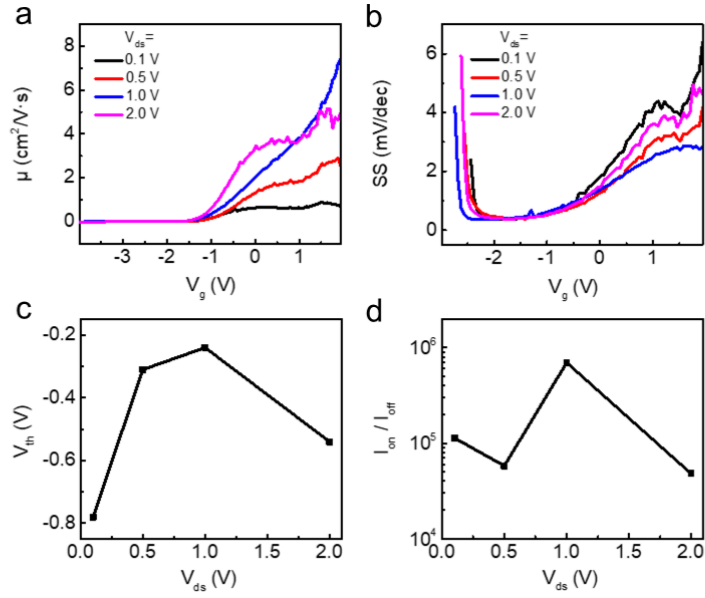

**Fig. S5** Characteristics of IGZO transistors with different values of  $V_{ds}$ . Plots demonstrating the (a)  $\mu$  and (b) SS as a function of  $V_g$ ,  $V_{ds}$  as a function of (c)  $V_{th}$  and (d)  $I_{on}/I_{off}$ .

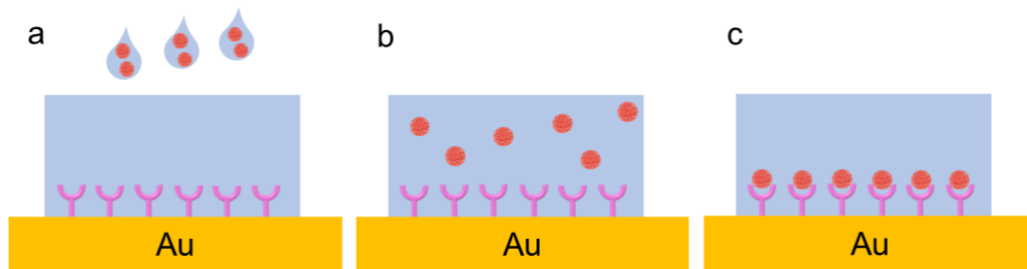

**Fig. S6** (a) Addition of PSA to the anti-PSA functionalized sensing pad. (b) Diffusion of PSA through the buffer solution. (c) Antigen-antibody specific binding between PSA and anti-PSA.

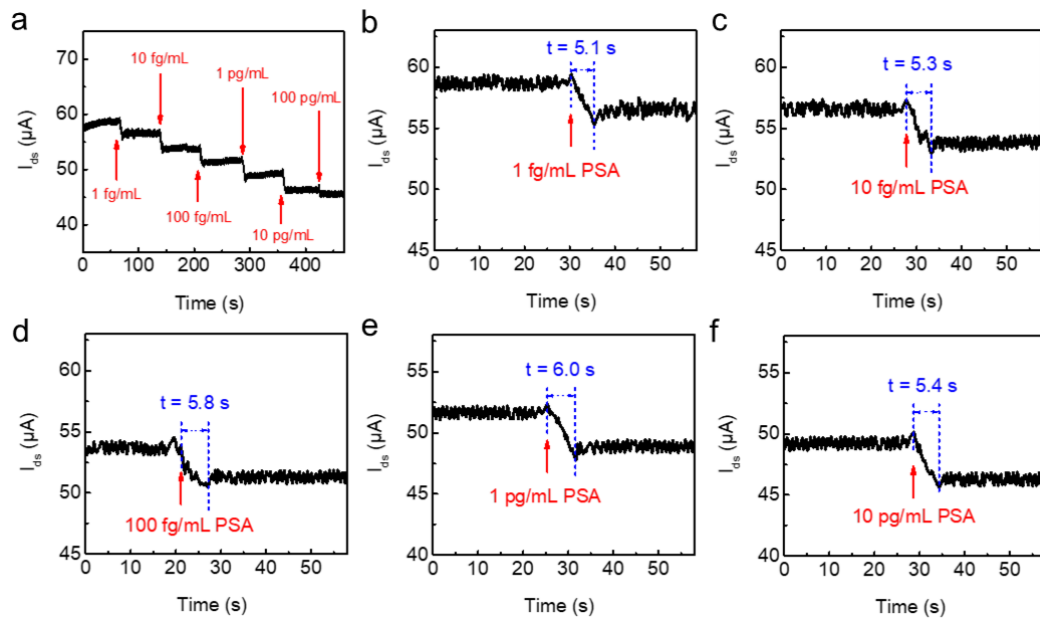

**Fig. S7** (a) Real-time detection of the PSA molecules at different concentrations. Current responses before and after the addition of PSA with concentrations of (b) 1 fg/mL, (c) 10 fg/mL, (d) 100 fg/mL, (e) 1 pg/mL, and (f) 10 pg/mL.

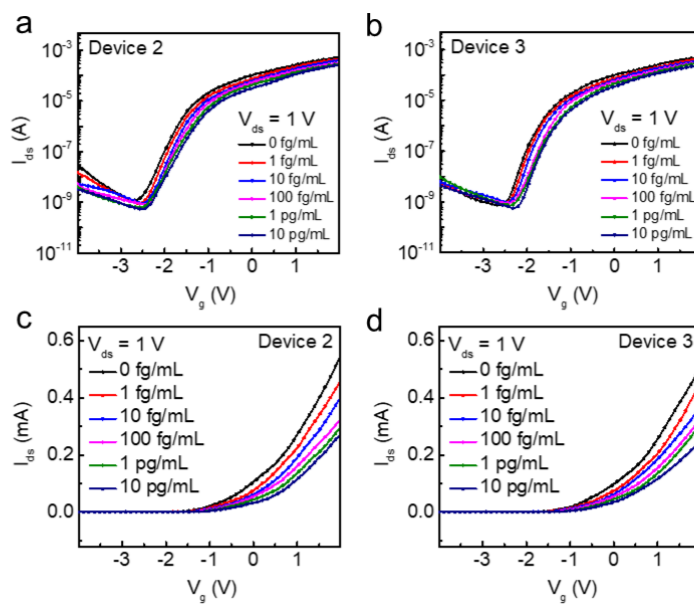

**Fig. S8** Changes in (a-b)  $V_{th}$  and (c-d)  $I_{ds}$  of different devices at various PSA concentrations.

**Table S1.**  $I_{ds}$  and  $V_{th}$  values of three different devices at various PSA concentrations.

| $C_{PSA}$<br>(fg/mL) | Device 1<br>$I_{ds}$ (mA) | Device 2<br>$I_{ds}$ (mA) | Device 3<br>$I_{ds}$ (mA) | Device 1<br>$V_{th}$ (V) | Device 2<br>$V_{th}$ (V) | Device 3<br>$V_{th}$ (V) |
|----------------------|---------------------------|---------------------------|---------------------------|--------------------------|--------------------------|--------------------------|
| 0                    | 0.259                     | 0.261                     | 0.264                     | -1.704                   | -1.698                   | -1.693                   |
| $10^0$               | 0.210                     | 0.217                     | 0.212                     | -1.678                   | -1.662                   | -1.678                   |
| $10^1$               | 0.189                     | 0.199                     | 0.192                     | -1.576                   | -1.577                   | -1.552                   |
| $10^2$               | 0.157                     | 0.155                     | 0.164                     | -1.497                   | -1.504                   | -1.471                   |
| $10^3$               | 0.135                     | 0.133                     | 0.140                     | -1.401                   | -1.398                   | -1.388                   |
| $10^4$               | 0.114                     | 0.112                     | 0.120                     | -1.313                   | -1.309                   | -1.310                   |
